# Supplementary material for: Mn4+-activated oxyfluoride K3TaOF6 red phosphor with intense zero phonon line for warm white light-emitting diodes
Source: Royal Society of Chemistry journal article supplement (doi:10.1039/d1ra05174a), 2021-01-01
Supplement: d1ra05174a1.pdf [file d1ra05174a1.pdf]

# **Mn<sup>4+</sup>-activated oxyfluoride K<sub>3</sub>TaOF<sub>6</sub> red phosphor with intense zero phonon line for warm white light-emitting diodes**

Jiao Wu<sup>a</sup>, Bo Wang<sup>a\*</sup>, Zhiyuan Liu<sup>a</sup>, Kang Zhang<sup>a</sup> and Qingguang Zeng<sup>a\*</sup>

<sup>a</sup>School of Applied Physics and Materials, Wuyi University, Jiangmen, Guangdong  
529020, P.R. China

Corresponding Authors: wangbo312@mails.ucas.ac.cn; zengqg@mail.ustc.edu.cn

## Characterizations

The phase composition of  $\text{K}_3\text{TaOF}_6\text{:Mn}^{4+}$  were measured by a powder diffractometer (X' Pert PRO, Cu  $K\alpha$ ,  $\lambda = 1.5418 \text{ \AA}$ ). The photoluminescence (PL) spectra were recorded by Edinburgh Instruments (FLS 980) equipped with 450 W xenon lamps as the excitation source. The diffuse reflection spectra (DRS) of the samples were carried out on an UV-Vis-NIR spectrophotometer (Lambda 950, Perkin Elmer), using  $\text{BaSO}_4$  as a standard reference. The morphologies of the samples were characterized using a scanning electron microscope (SEM, JSM-6700F). A LTTL-3DS measurement was used to record the 3D TL glow curves at a heating rate of 1 K/s. Each sample was firstly irradiated under Hg UV light for 3 min, and then kept in the dark for 5 min. The electron paramagnetic resonance (EPR) spectrum of  $\text{K}_3\text{TaOF}_6\text{:Mn}^{4+}$  was obtained on a JES-FA 200 EPR spectrometer. High-resolution transmission electron microscopy (HRTEM) was recorded using a FEI Tecnai G2S-Twin.

## Figure Caption

**Fig. S1.** (a-c) The Rietveld analysis for  $\text{K}_3\text{TaOF}_6\text{:xMn}^{4+}$  sample on the XRD data (d)

Cell volumes as a function of composition x.

**Fig. S2.** (a) Room temperature DRS of  $\text{K}_3\text{TaOF}_6\text{:xMn}^{4+}$  (b) host bandgap calculated

from the reflectance spectrum.

**Fig. S3.** (a) The concentration-dependent integrated emission intensity. (b) the decay

curves of  $\text{K}_3\text{TaOF}_6\text{:xMn}^{4+}$  samples.

**Fig. S4.** (a) Tanabe-Sugano energy diagram for  $\text{Mn}^{4+}$  ( $3d^3$ ) in an octahedral crystal field

(b) The relationship between the  $\text{Mn}^{4+}\text{:}^2\text{E}$  energy level and the calculated nephelauxetic ratio in different  $\beta$  hosts.

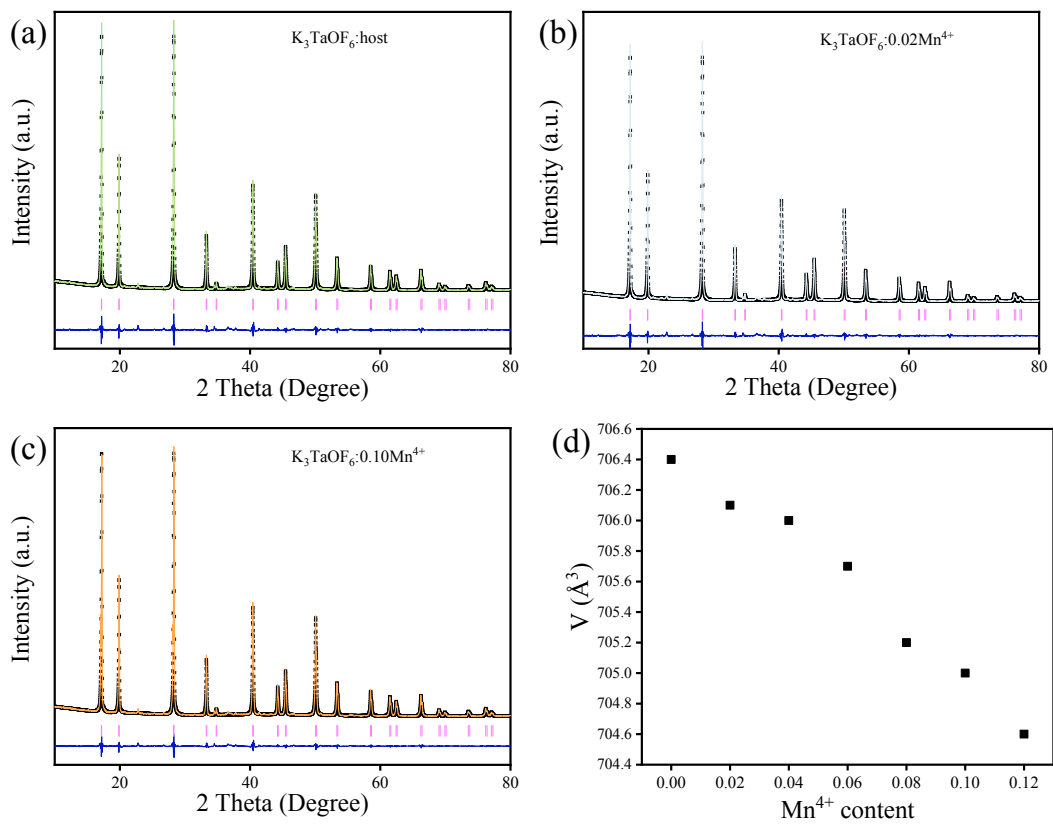

Fig.S1. (a-c)The Rietveld analysis for  $K_3TaOF_6$ : $xMn^{4+}$  sample on the XRD data (d)

Cell volumes as a function of composition x.

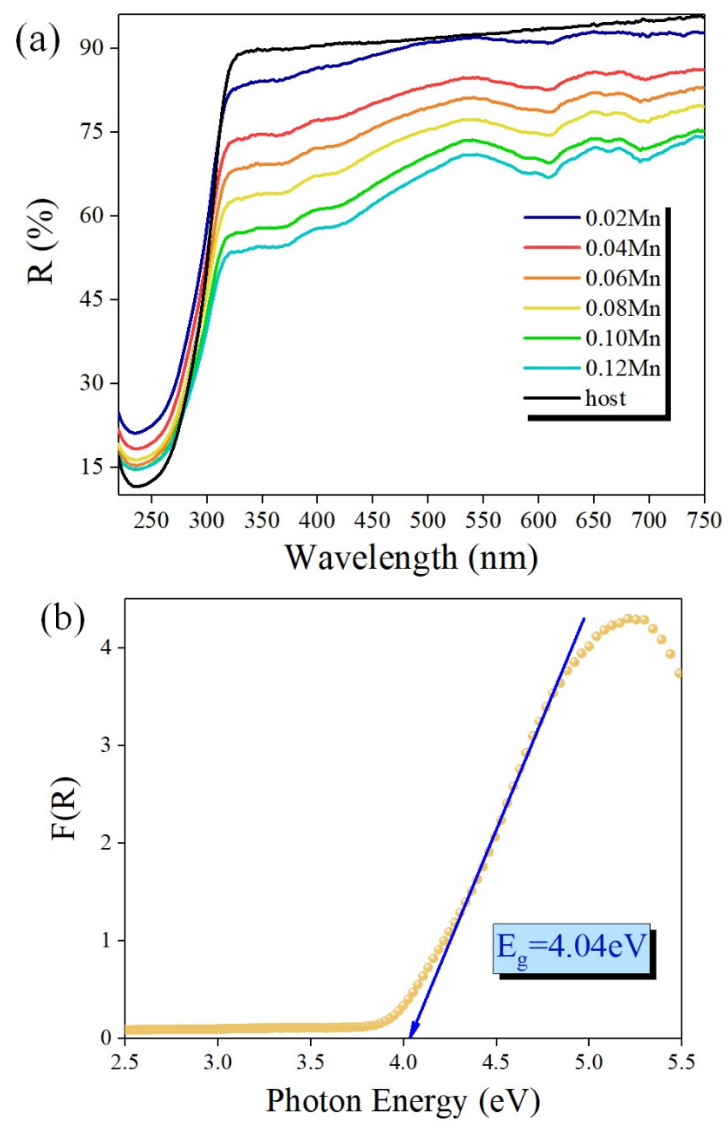

Fig. S2. (a) Room temperature DRS of  $K_3TaOF_6:xMn^{4+}$  (b) host bandgap calculated from the reflectance spectrum.

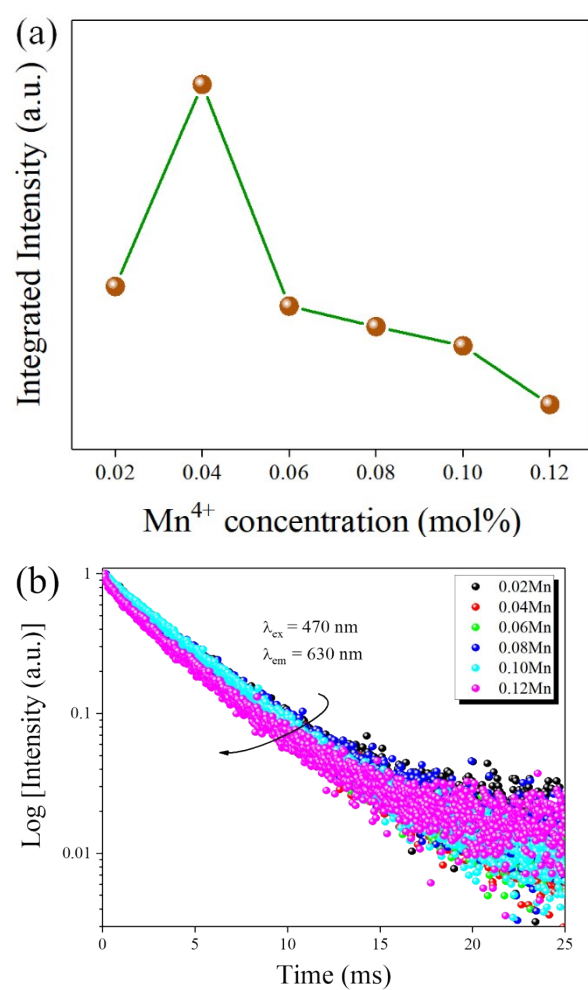

Fig. S3. (a) The concentration-dependent integrated emission intensity. (b) the decay curves of K<sub>3</sub>TaOF<sub>6</sub>:xMn<sup>4+</sup> samples.

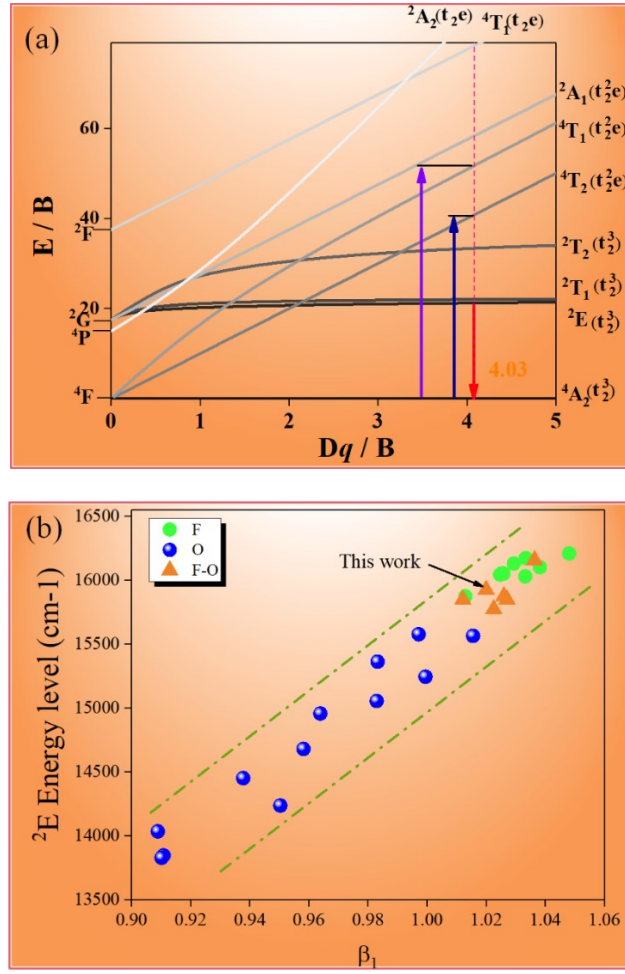

Fig. S4. (a) Tanabe-Sugano energy diagram for  $\text{Mn}^{4+} (3d^3)$  in an octahedral crystal field  
 (b) The relationship between the  $\text{Mn}^{4+}:^2E$  energy level and the calculated nephelauxetic ratio in different  $\beta$  hosts.
